# Supplementary material for: The Senescence‐Related Signature Predicts Prognosis and Characterization of Tumor Microenvironment Infiltration in Pancreatic Cancer
Source: Hindawi journal article supplement (doi:10.1155/2022/1916787), 2022-01-01

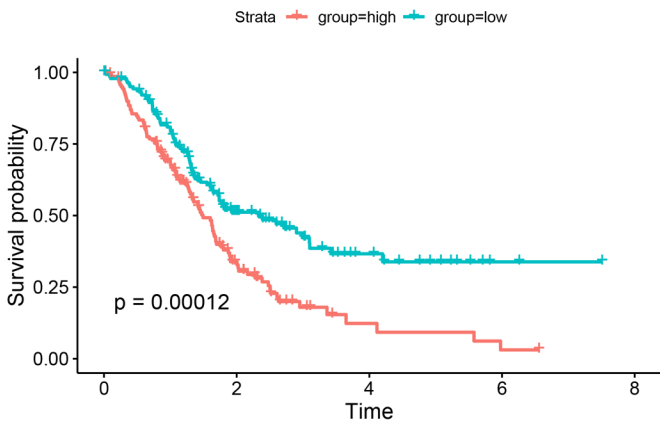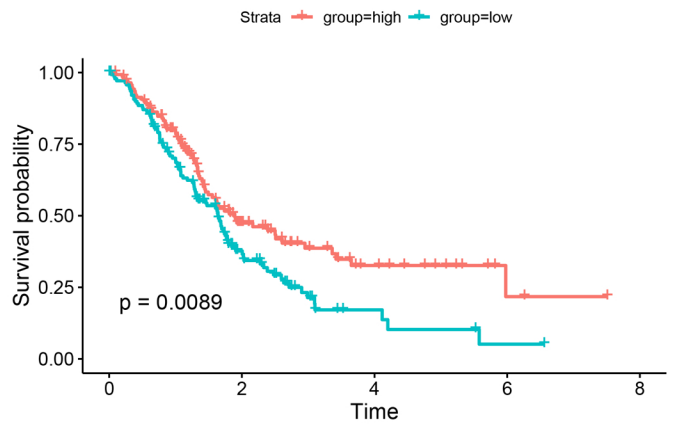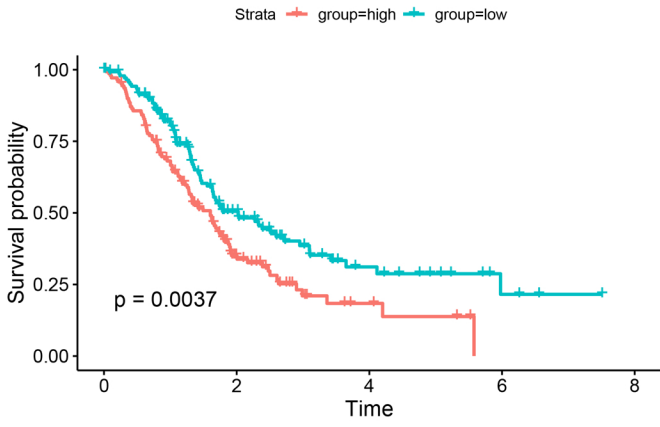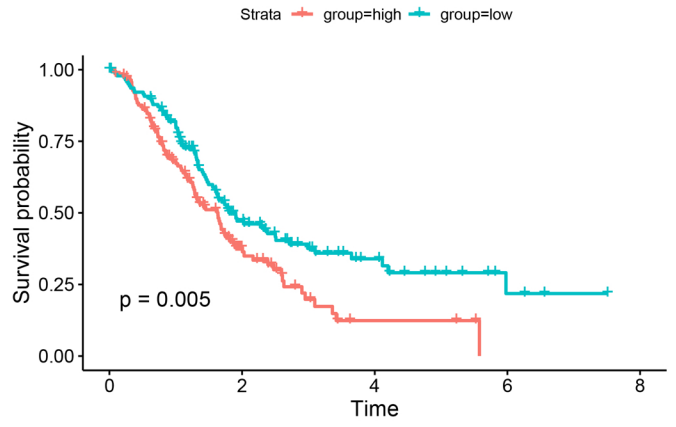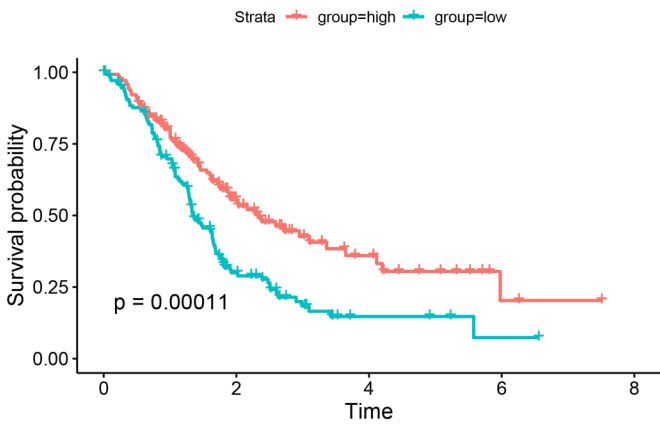

Supplement: f1 [file 1916787.f1.pdf]
